# Supplementary material for: Synoptic weather patterns conducive to compound extreme rainfall-wave events in the NW Mediterranean
Source: Copernicus journal article supplement (doi:10.5194/hess-2023-104), 2023-05-10

Figure S0. BNs for the solo rain (SR) and solo wave (SW) events

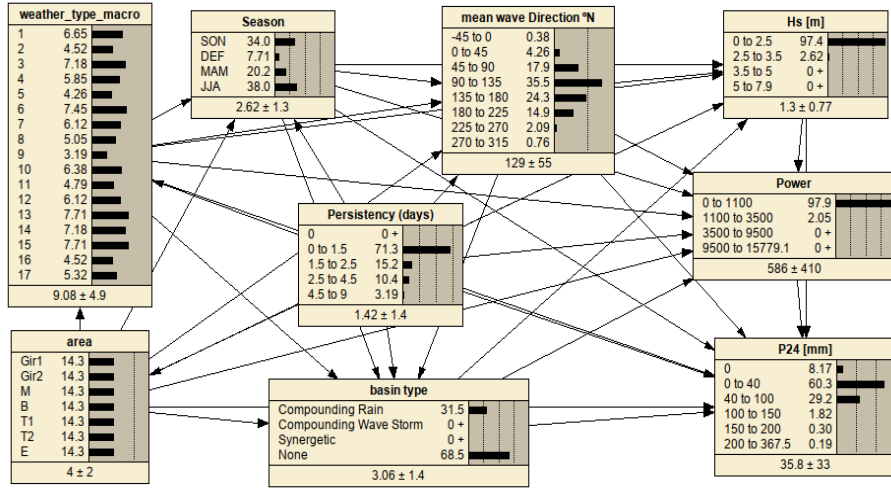

SR

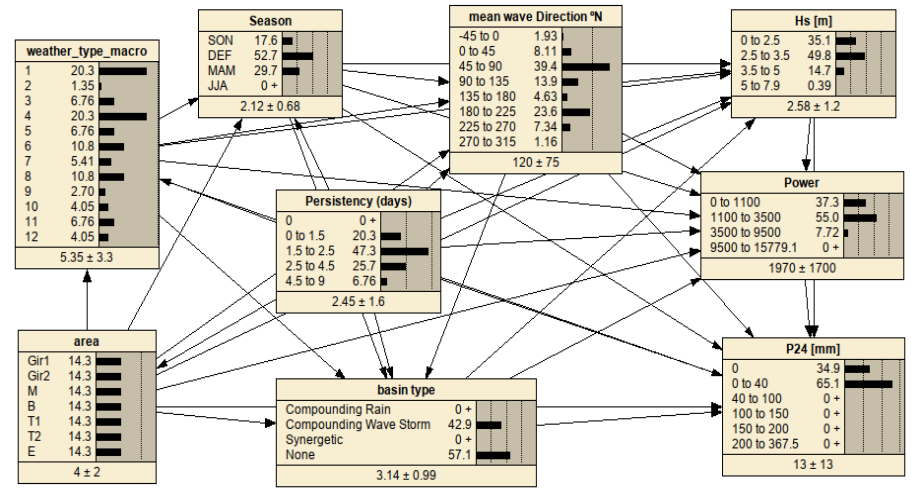

SW

Figure S1. Annual frequency (a), monthly frequency (b), average monthly magnitudes of individual and compound events (c) and, average monthly number of affected basins (d) for the different coastal sectors

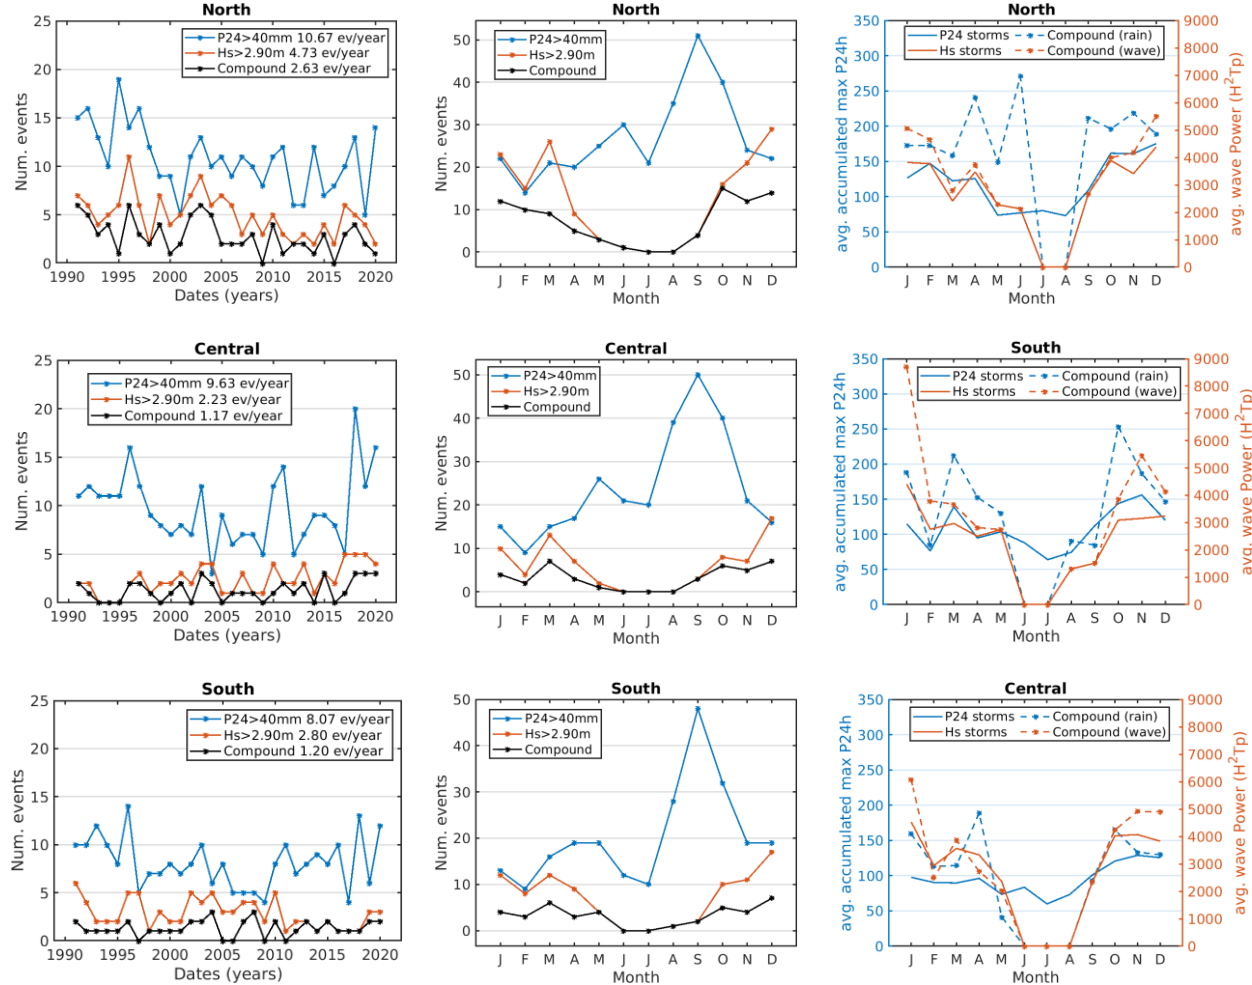

Table S1. Compound (C) SWP description and probabilities of occurrence conditioned to event intensities. Colour scale ranges from light to dark according to quantiles relative to the maximum value in each column. Blue colours represent probabilities of occurrence calculated over the respective number of events (without specific conditions); red scale colours represent BN probabilities conditioned to different thresholds of P24 and wave power and calculated considering their cumulative occurrence in all basins

|              | Synoptic pattern | n°days | P(SWP) n/N | 1- P(SWP) P24≥100mm | P(SWP) P24≥200mm | P(SWP) C≥IV | 2- P(SWP) C≥II + Hs ≥ 3.5 m | P(SWP) 1+2 Multivar.) | Long Name                               | Surface low-pressure location   | Surface high-pressure location         | 500-mb through                                  | 500-mb ridge                                         | Prevailing wind direction | Seasonality                               |
|--------------|------------------|--------|------------|---------------------|------------------|-------------|-----------------------------|-----------------------|-----------------------------------------|---------------------------------|----------------------------------------|-------------------------------------------------|------------------------------------------------------|---------------------------|-------------------------------------------|
| Atlantic low | SWP1c-NWPL       | 6      | 5,4 %      | 4,4 %               | 0,0 %            | 0,0 %       | 3,9 %                       | 3,2 %                 | NW Peninsula Low                        | NW Iberian Peninsula            | North Africa to North Europe           | NE Atlantic to Iberian Peninsula                | Mediterranean Sea to Iceland                         | SE                        | Late Autumn + Winter                      |
|              | SWP9c-AL         | 16     | 14,3 %     | 11,1 %              | 0,0 %            | 0,0 %       | 5,2 %                       | 0,0 %                 | Atlantic Low                            | North Atlantic                  | Azores islands to NE Europe            | Iceland to NW Iberian Peninsula                 | Azores islands - Mediterranean Sea -Central Europe   | SE-S                      | Cold part of the year                     |
| Cut-off      | SWP2c-SPC        | 12     | 10,7 %     | 11,1 %              | 16,7 %           | 40,0 %      | 13,5 %                      | 25,8 %                | South Peninsula Cut-Off                 | S-SE Iberian Peninsula          | British Islands to Central Europe      | **                                              | Atlantic to NE Africa                                | NE                        | August + November + Winter + Early Spring |
|              | SWP3c-sSEPC      | 7      | 6,3 %      | 3,3 %               | 0,0 %            | 0,0 %       | 0,0 %                       | 0,0 %                 | shallow SE Peninsula Cut-Off            | SE Iberian Peninsula            | Azores Islands to Central Europe       | **                                              | North Africa to Central Europe                       | E                         | Autumn + February + May                   |
|              | SWP6c-SEPC       | 7      | 6,3 %      | 8,9 %               | 0,0 %            | 20,0 %      | 12,3 %                      | 6,5 %                 | SE Peninsula Cut-Off                    | SE Iberian Peninsula            | Azores Islands to Central Europe       | **                                              | North Africa to Northern Europe                      | NE                        | Late Autumn + Winter                      |
|              | SWP10c-IPC       | 8      | 7,1 %      | 13,3 %              | 16,7 %           | 0,0 %       | 7,1 %                       | 3,2 %                 | Iberian Peninsula Cut-Off               | SE Iberian Peninsula            | Azores Islands to Central Europe       | **                                              | Azores Islands to Central Europe                     | E                         | Late Autumn + December + Spring           |
|              | SWP13c-sNPC      | 5      | 4,5 %      | 11,1 %              | 8,3 %            | 0,0 %       | 0,0 %                       | 0,0 %                 | shallow North Iberian Peninsula C-O     | SE Iberian Peninsula            | Azores Islands to Mediterranean Sea    | **                                              | Azores Islands to NE Africa                          | E                         | Autumn + Winter + Early Spring            |
|              | SWP14c-NPC       | 10     | 8,9 %      | 13,3 %              | 33,3 %           | 8,6 %       | 10,3 %                      | 16,1 %                | North Iberian Peninsula C-O             | SE Iberian Peninsula            | Atlantic to British Islands            | **                                              | Atlantic to NE Africa                                | NE-E                      | Late Autumn + Early Spring + January      |
|              | SWPc15c-CSC      | 2      | 1,8 %      | 3,3 %               | 0,0 %            | 0,0 %       | 0,0 %                       | 0,0 %                 | Cantabric Sea Cut-Off                   | Mediterranean Sea               | W Iberian Peninsula to British Islands | **                                              | NE Africa to South Europe                            | N-NE                      | Late Spring                               |
|              | SWP17c-sSPC      | 2      | 1,8 %      | 3,3 %               | 0,0 %            | 0,0 %       | 1,3 %                       | 3,2 %                 | shallow South Iberian Peninsula Cut-Off | S Iberian Peninsula to N Africa | British Islands to Central Europe      | **                                              | **                                                   | E-NE                      | December                                  |
|              | SWP18c-SWPC      | 6      | 5,4 %      | 0,0 %               | 0,0 %            | 0,0 %       | 5,8 %                       | 0,0 %                 | South West Iberian Peninsula Cut-Off    | SW Iberian Peninsula            | British Islands to Central Europe      | **                                              | British Islands to NE Africa                         | E-NE                      | September to March                        |
| Trough       | SWP4c-WET        | 6      | 5,4 %      | 2,2 %               | 16,7 %           | 0,0 %       | 5,8 %                       | 3,2 %                 | Western Europe Through                  | Iberian Peninsula               | Atlantic sea                           | British Islands to Iberian Peninsula            | Atlantic Ridge + Mediterranean Ridge                 | E                         | Autumn + Spring                           |
|              | SWP5c-CET        | 5      | 4,5 %      | 1,1 %               | 0,0 %            | 0,0 %       | 2,6 %                       | 3,2 %                 | Central Europe Through                  | Mediterranean Sea               | North Atlantic Sea                     | Central-North Europe to Iberian Peninsula       | Atlantic Ridge + Mediterranean Ridge                 | N                         | Winter + Spring                           |
|              | SWP7c-CST        | 1      | 0,9 %      | 0,0 %               | 0,0 %            | 0,0 %       | 0,0 %                       | 0,0 %                 | Cantabric Sea Through                   | NW Mediterranean                | Azores islands                         | British Islands to NW Mediterr.                 | Azores Islands to NE Africa                          | NW-NE                     | December                                  |
|              | SWP8c-NMT        | 6      | 5,4 %      | 4,4 %               | 8,3 %            | 11,4 %      | 11,0 %                      | 9,7 %                 | North Mediterranean Through             | Mediterranean Sea               | North Sea                              | Western Europe to NW Mediterr.                  | NE Africa to North Europe                            | NE                        | September + Winter                        |
|              | SWP11c-AT        | 2      | 1,8 %      | 3,3 %               | 0,0 %            | 5,7 %       | 3,9 %                       | 9,7 %                 | Atlantic Through                        | W Iberian Peninsula             | North Africa to Central Europe         | NE Atlantic to Iberian Peninsula                | NE Africa to British Islands                         | E-SE                      | Winter                                    |
|              | SWP12c-IPT       | 8      | 7,1 %      | 1,1 %               | 0,0 %            | 0,0 %       | 5,2 %                       | 3,2 %                 | Iberian Peninsula Through               | NW Iberian Peninsula            | Azores islands                         | Iceland to British Islands to Iberian Peninsula | Azores Islands to NE Africa                          | S-SE                      | Winter + Early spring + October           |
|              | SWP16c-EET       | 3      | 2,7 %      | 4,4 %               | 0,0 %            | 14,3 %      | 12,3 %                      | 12,9 %                | Eastern Europe Through                  | E Iberian Peninsula             | North Sea to Central Europe            | North Western Europe to NW. Mediterranean       | Azores Islands to British Islands and N to NE Africa | NE                        | October + March                           |

Table S2. Solo Wave (SW) SWP description and probabilities of occurrence conditioned to event intensities. Colour scale ranges from light to dark according to quantiles relative to the maximum value in each column. Blue colours represent probabilities of occurrence calculated over the respective number of events (without specific conditions); red scale colours represent BN probabilities conditioned to different thresholds of P24 and wave power and calculated considering their cumulative occurrence in all basins

|              | Synoptic pattern | n'days | P(SWP) n/N | P(SWP) C≥II | P(SWP) C≥II+ Hs≥3.5 | Long Name               | Surface low-pressure location         | Surface high-pressure location | 500-mb trough                              | 500-mb ridge                                         | Prevailing wind direction | Seasonality                               |
|--------------|------------------|--------|------------|-------------|---------------------|-------------------------|---------------------------------------|--------------------------------|--------------------------------------------|------------------------------------------------------|---------------------------|-------------------------------------------|
| Atlantic low | SWP4w-AL         | 15     | 20,3%      | 17,5%       | 30,4%               | Atlantic Low            | Atlantic to British Islands           | S Azores Islands               | Atlantic to Cantabric Sea                  | Azores Islands to N Africa                           | SW                        | Cold part of the year                     |
|              | SWP9w-NSL        | 2      | 2,7%       | 0,0%        | 0,0%                | North Sea Low           | North Sea and British Islands         | Central to NW Africa           | North Sea to Azore Islands                 | North Africa                                         | SW                        | December + March                          |
| Cut-off      | SWP5w-SWPC       | 5      | 6,8%       | 5,0%        | 8,7%                | NW Peninsula Cut-Off    | NW Peninsula                          | Scandinavian Peninsula         | **                                         | North Africa to Mediterranean Sea                    | E-SE                      | Late Autumn + Late Winter to Early Spring |
|              | SWP10w-EMC       | 3      | 4,1%       | 10,0%       | 17,4%               | E Mediterranean Cut-Off | Atlantic and W Scandinavian Peninsula | British Islands                | **                                         | British Islands and Azores Islands to N Africa       | NE                        | December + April                          |
|              | SWP11w-NMC       | 5      | 6,8%       | 5,0%        | 0,0%                | Gulf of Lion Cut-Off    | Mediterranean Sea and W Europe        | Atlantic                       | **                                         | Atlantic to NE Africa                                | N                         | November + January + April                |
|              | SWP12c-SEPC      | 3      | 4,1%       | 5,0%        | 8,7%                | SE Peninsula Cut-Off    | North Sea and Mediterranean Sea       | Azores Islands and SW Europe   | **                                         | Azores Islands to SW Europe                          | N-NE                      | November + February                       |
| Trough       | SWP1w-NMT        | 15     | 20,3%      | 27,5%       | 0,0%                | N Mediterranean Through | Mediterranean Sea                     | British Islands                | Scandinavian Peninsula to NW Mediterranean | Atlantic to W Mediterranean Sea                      | N                         | Cold part of the year                     |
|              | SWP2w-NWET       | 1      | 1,4%       | 5,0%        | 8,7%                | NW Europe Through       | Central and NW Europe                 | Atlantic                       | Central Europe to NW Mediterranean         | British Islands to Azores Islands to N Africa        | N-NW                      | November                                  |
|              | SWP3w-WET        | 5      | 6,8%       | 0,0%        | 0,0%                | W European Through      | NW Europe                             | Atlantic                       | NW Europe to NW Mediterranean              | Atlantic to N Africa                                 | NW                        | Cold part of the year                     |
|              | SWPw6-NST        | 8      | 10,8%      | 0,0%        | 0,0%                | North Sea Through       | North Sea                             | Azores Islands                 | North Sea to NW Mediterranean              | Azores Islands to N Africa                           | W                         | Cold part of the year                     |
|              | SWP7w-ET         | 4      | 5,4%       | 10,0%       | 17,4%               | European Through        | W Scandinavian Peninsula              | Iceland                        | NW Europe to Iberian Peninsula             | Iceland and S Azores Islands to N Africa             | NE                        | December to March                         |
|              | SWP8w-EMT        | 8      | 10,8%      | 15,0%       | 8,7%                | E Mediterranean Through | SW Iceland                            | N Europe                       | East Europe to Mediterranean               | Scandinavian Peninsula to N Africa to Azores Islands | E                         | January to March                          |

Table S3. Solo Rain (SR) SWP description and probabilities of occurrence conditioned to event intensities. Colour scale ranges from light to dark according to quantiles relative to the maximum value in each column. Blue colours represent probabilities of occurrence calculated over the respective number of events (without specific conditions); red scale colours represent BN probabilities conditioned to different thresholds of P24 and wave power and calculated considering their cumulative occurrence in all basins

|              | Synoptic pattern | n*days | P(SWP) n/N | P(SWP) P24≥100 mm | P(SWP) P24≥200mm | Long Name                        | Surface low-pressure location           | Surface high-pressure location                    | 500-mb through                                    | 500-mb ridge                                  | Prevailing wind direction   | Seasonality                           |
|--------------|------------------|--------|------------|-------------------|------------------|----------------------------------|-----------------------------------------|---------------------------------------------------|---------------------------------------------------|-----------------------------------------------|-----------------------------|---------------------------------------|
| Atlantic low | SWP7r-BIL        | 23     | 6,1 %      | 0,0 %             | 0,0 %            | British Islands Low              | British Islands                         | Azores Islands to W Europe                        | British Islands to Cantabric Sea                  | Azores Islands to Southern Mediterranean Sea  | S-SE                        | Late Spring + Autumn                  |
|              | SWP8r-AL         | 19     | 5,1 %      | 13,1 %            | 0,0 %            | Atlantic Low                     | Atlantic                                | NW Europe                                         | Atlantic to NW Iberian Peninsula                  | Azores Islands to Mediterranean Sea           | SW                          | Cold part of the year                 |
|              | SWP10r-IL        | 24     | 6,4 %      | 18,0 %            | 20,0 %           | Iceland Low                      | S Iceland                               | Azores Islands to W Europe                        | W British Islands to Cantabric Sea                | Azores Islands to Central Europe              | SW                          | Early Autumn + Winter + Spring        |
|              | SWP16r-NWAL      | 17     | 4,5 %      | 11,5 %            | 0,0 %            | NW Atlantic Low                  | Atlantic – S Iceland                    | Azores Islands to Scandinavian Peninsula          | Atlantic to NW Iberian Peninsula                  | Azores Islands to North Sea                   | S                           | Summer + Autumn + January             |
| Cut-off      | SWP6r-sNWPC      | 28     | 7,4 %      | 11,5 %            | 0,0 %            | NW Peninsula Cut-Off             | SE Iberian Peninsula                    | British Islands                                   | **                                                | British Islands to N Africa                   | **                          | All year                              |
|              | SWP11r-SBIC      | 18     | 4,8 %      | 4,9 %             | 20,0 %           | S British Islands Cut-Off        | NW to NE Peninsula                      | E Iceland                                         | **                                                | N Africa to Azores Islands to Iceland         | S                           | Early Autumn + Spring                 |
| Trough       | SWP1r-SPT        | 25     | 6,6 %      | 3,3 %             | 0,0 %            | Scandinavian Peninsula Thorough  | Scandinavian Peninsula                  | Atlantic                                          | Scandinavian Peninsula to N Iberian Peninsula     | Atlantic to Mediterranean Sea                 | NW                          | February to October                   |
|              | SWP2r-NEET       | 17     | 4,5 %      | 1,6 %             | 0,0 %            | NE Europe Through                | Central Europe                          | Azores Islands and N British Islands to North Sea | NW Europe to NW Mediterranean                     | N Atlantic to Mediterranean Sea               | NW                          | Late Spring to Early Autumn           |
|              | SWP3r-BIT        | 27     | 7,2 %      | 3,3 %             | 0,0 %            | British Islands Through          | E Iberian Peninsula                     | Atlantic to British Islands                       | North Sea to Iberian Peninsula                    | Azores Islands to Mediterranean Sea           | NW                          | Late Spring to Early Autumn           |
|              | SWP4r-AT         | 22     | 5,9 %      | 6,6 %             | 0,0 %            | Atlantic Through                 | S Iberian Peninsula                     | Azores Islands and N Europe                       | S Iceland to NW Iberian Peninsula                 | Azores Islands to N Europe                    | E-SE                        | All year                              |
|              | SWP5r-WET        | 16     | 4,3 %      | 1,6 %             | 0,0 %            | W Europe Thorough                | W Iberian Peninsula                     | Azores Islands to British Islands                 | British Islands to W Iberian Peninsula            | Atlantic to Mediterranean Sea                 | S-SE                        | Late Winter + Spring + Autumn         |
|              | SWP9r-NWPT       | 12     | 3,2 %      | 11,5 %            | 60,0 %           | NW Peninsula Through             | Atlantic                                | British Islands to SW Europe and N Africa         | Atlantic to NW Iberian Peninsula                  | British Islands to Central Europe to N Africa | SE                          | Autumn + Winter + April + June        |
|              | SWP12r-NET       | 23     | 6,1 %      | 0,0 %             | 0,0 %            | N Europe Through                 | Scandinavian Peninsula                  | South Iceland and Azores Islands                  | North Europe to Iberian Peninsula                 | Atlantic to Mediterranean Sea                 | NW                          | All year                              |
|              | SWP13r-NST       | 29     | 7,7 %      | 3,3 %             | 0,0 %            | North Sea Through                | North Sea                               | Atlantic                                          | North Sea to NW Mediterranean                     | Atlantic Sea to Mediterranean Sea to W Europe | NW                          | Late Spring to Early Autumn + January |
|              | SWP14r-WSPT      | 27     | 7,2 %      | 8,2 %             | 0,0 %            | W Scandinavian Peninsula Through | N North Sea                             | Atlantic                                          | North Sea to British Islands to NW Peninsula      | Atlantic Sea to Mediterranean Sea to W Europe | SE-SW                       | Spring to Autumn + January            |
|              | SWP15r-CST       | 29     | 7,7 %      | 0,0 %             | 0,0 %            | Cantabric Sea Through            | S Iceland                               | Atlantic and Scandilavian Peninsula               | S Iceland to British Islands to Iberian Peninsula | Azores Islands to Scandinavian Peninsula      | S-W                         | Spring to Early Autumn                |
| SWP17r-IT    | 20               | 5,3 %  | 1,6 %      | 0,0 %             | Iceland Through  | Iceland                          | Atlantic to Azores Islands and N Africa | Iceland to British Islands to Iberian Peninsula   | Atlantic to Mediterranean Sea                     | W                                             | May to September + December |                                       |



Figure S2. Composites of the MSLP (contour lines) and Z500 fields (colormap) for the 18 SWP of compound type.

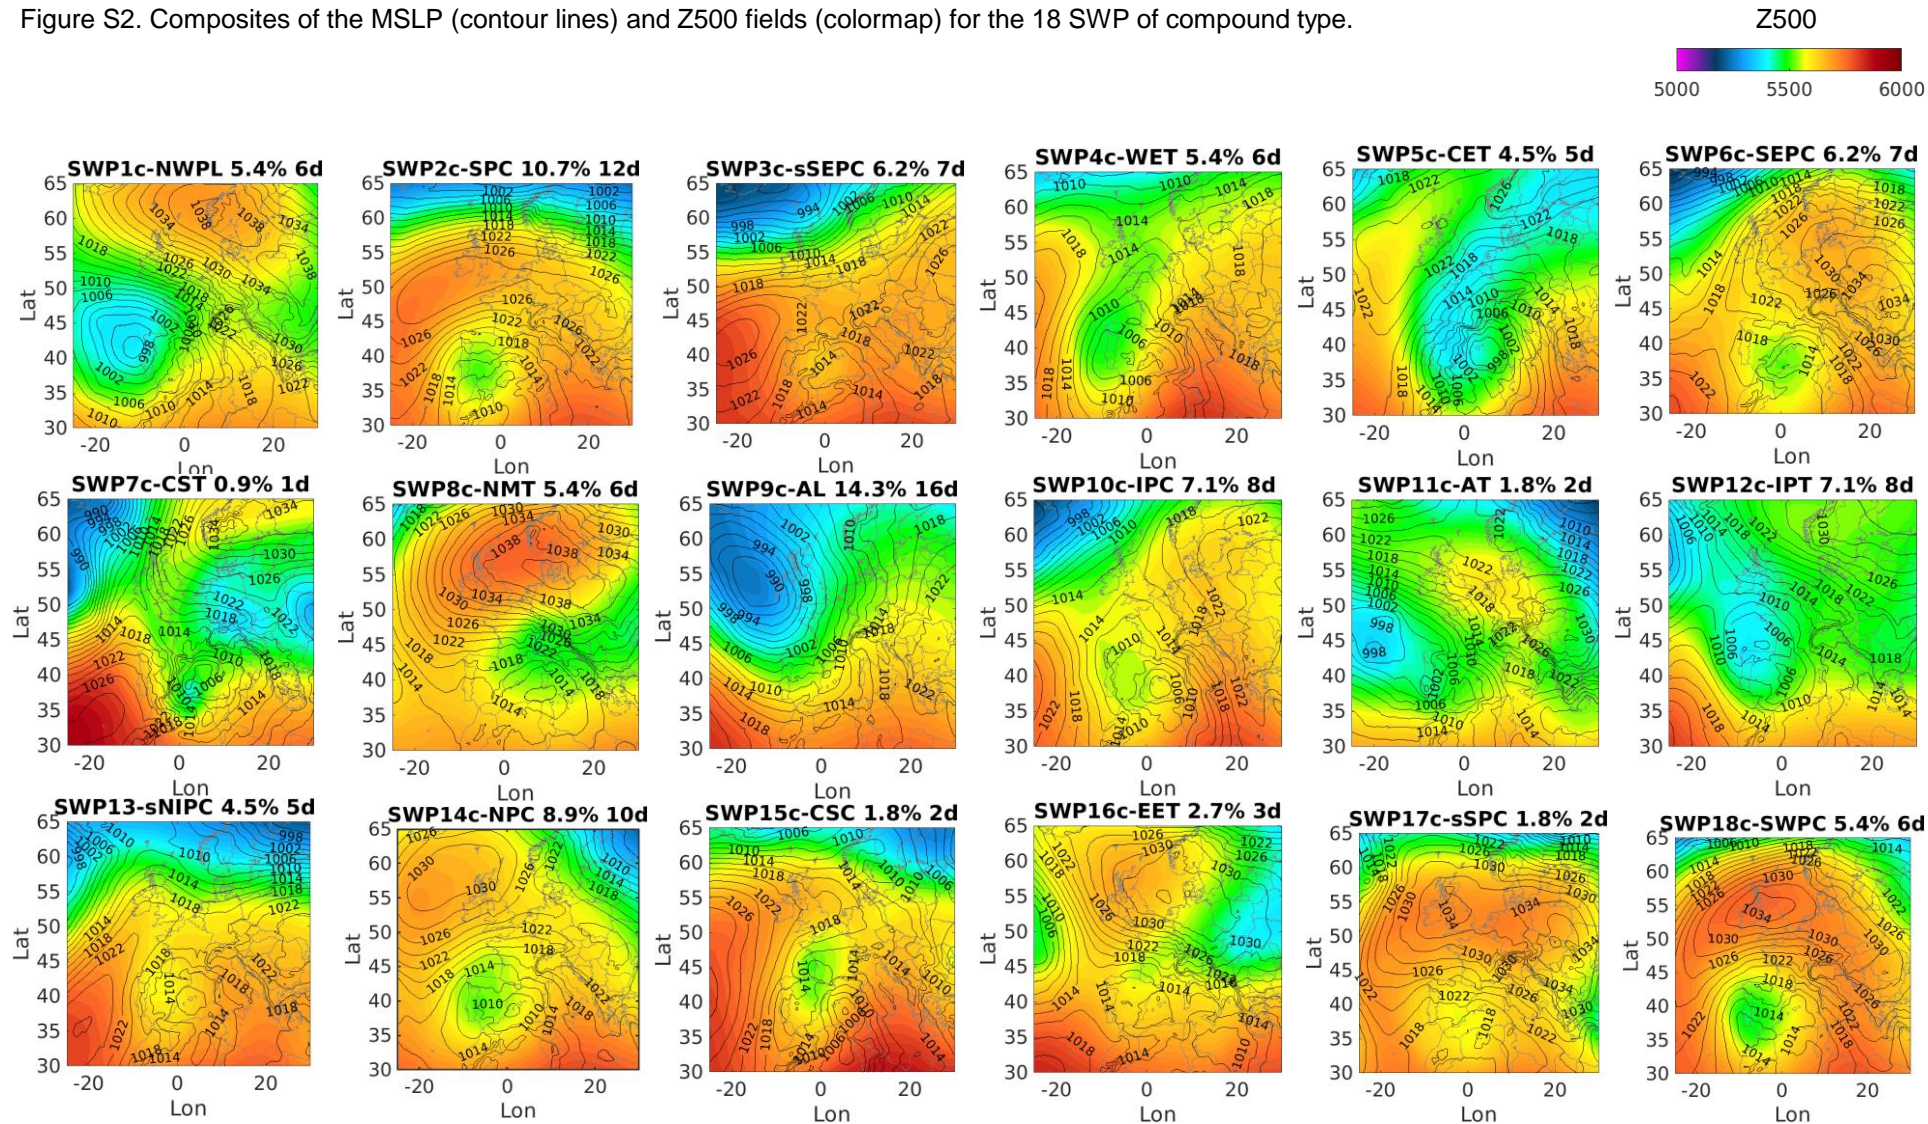



Figure S3. Composites of wind velocity (m/s) field for the 18 SWP of compound type.

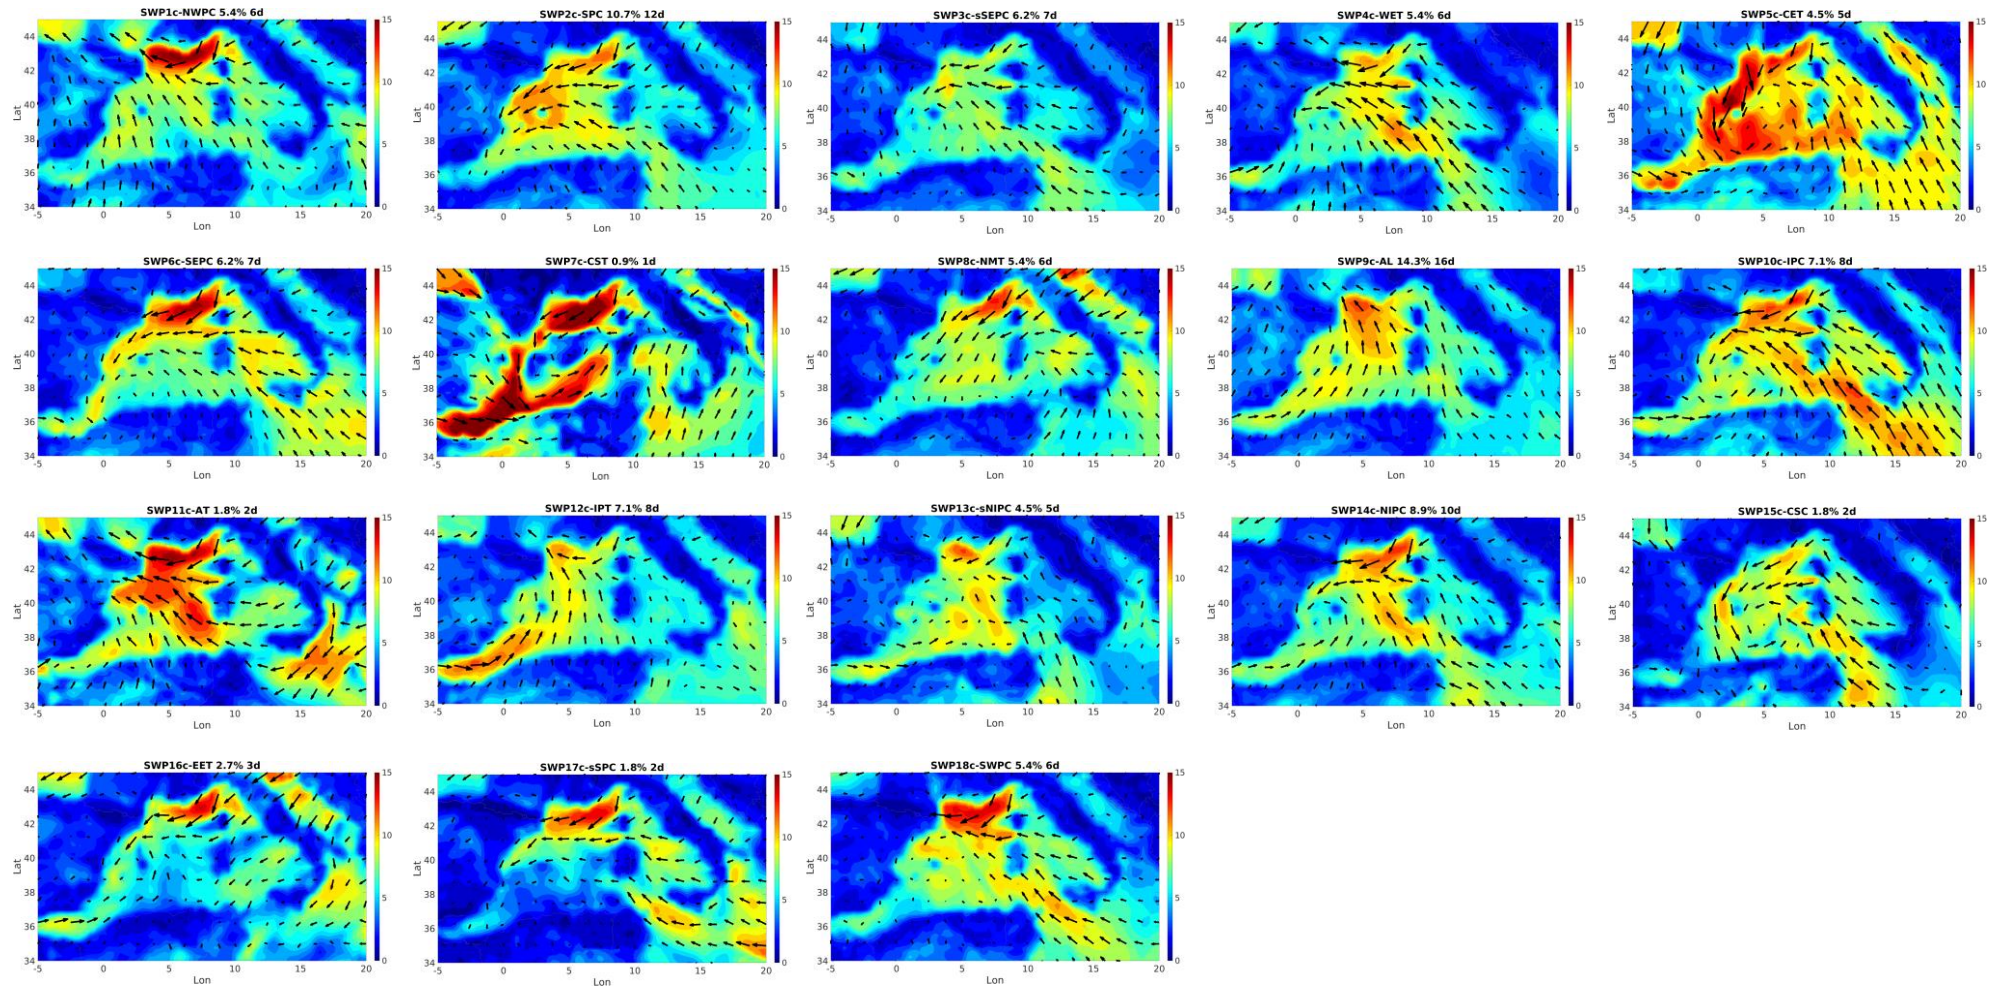



Figure S4. Composites of the MSLP (contour lines) and Z500 (colormap) fields for the 12 SWP of solo wave (SW) type.

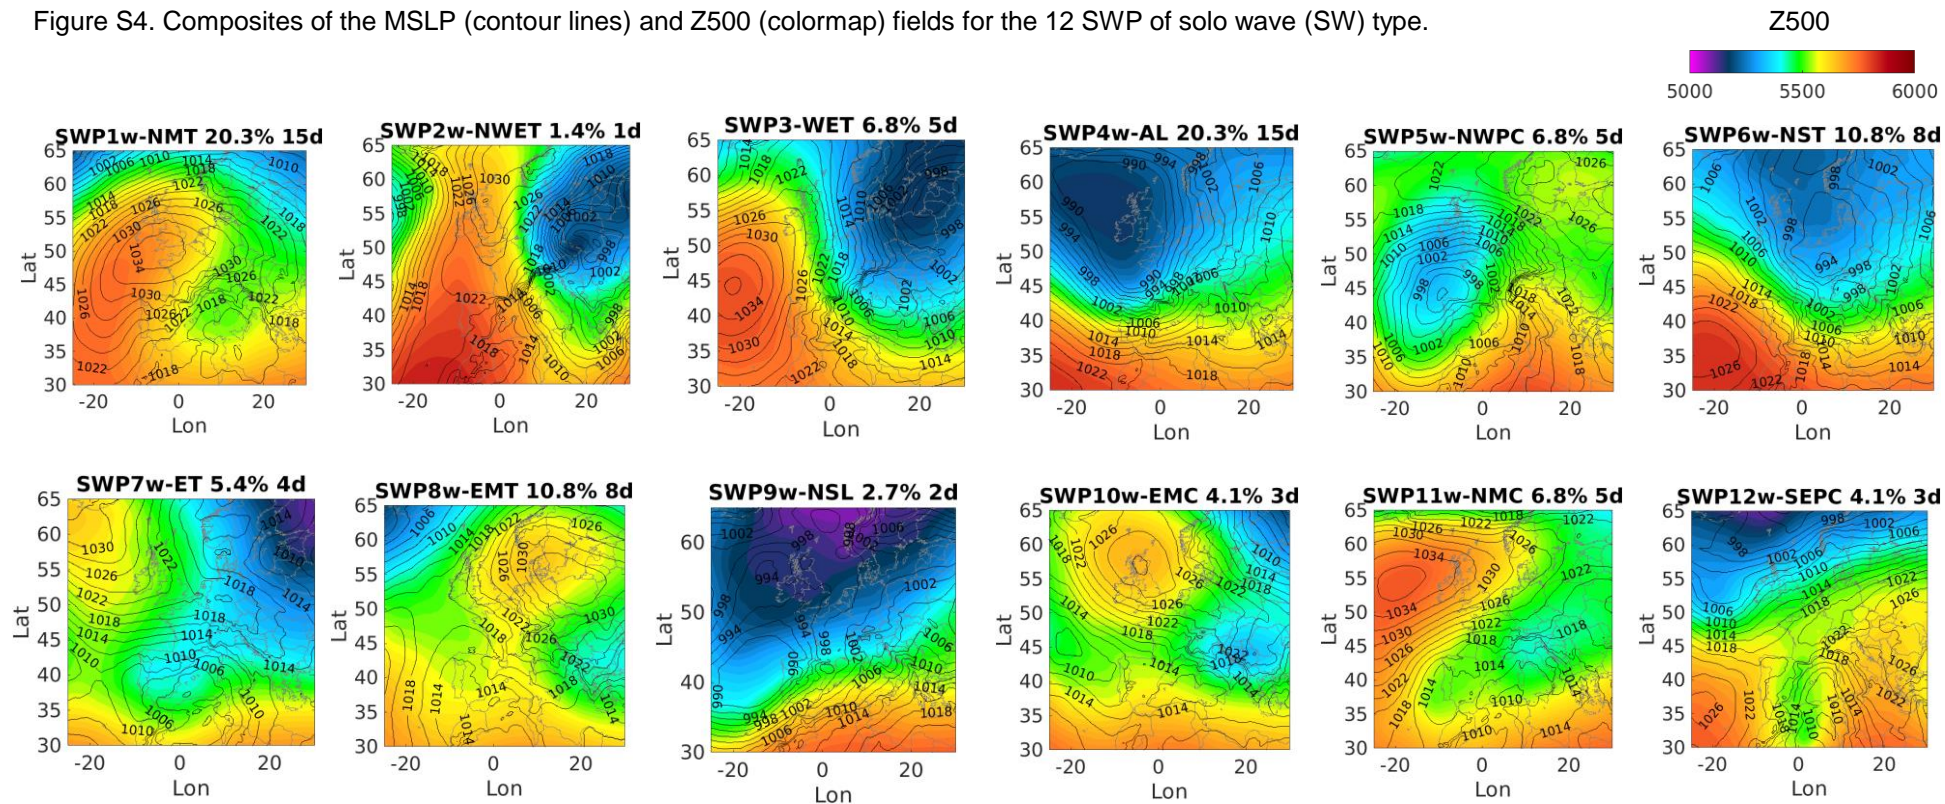



Figure S5. Composites of wind velocity field (m/s) for the 12 SWP of solo wave (SW) type.

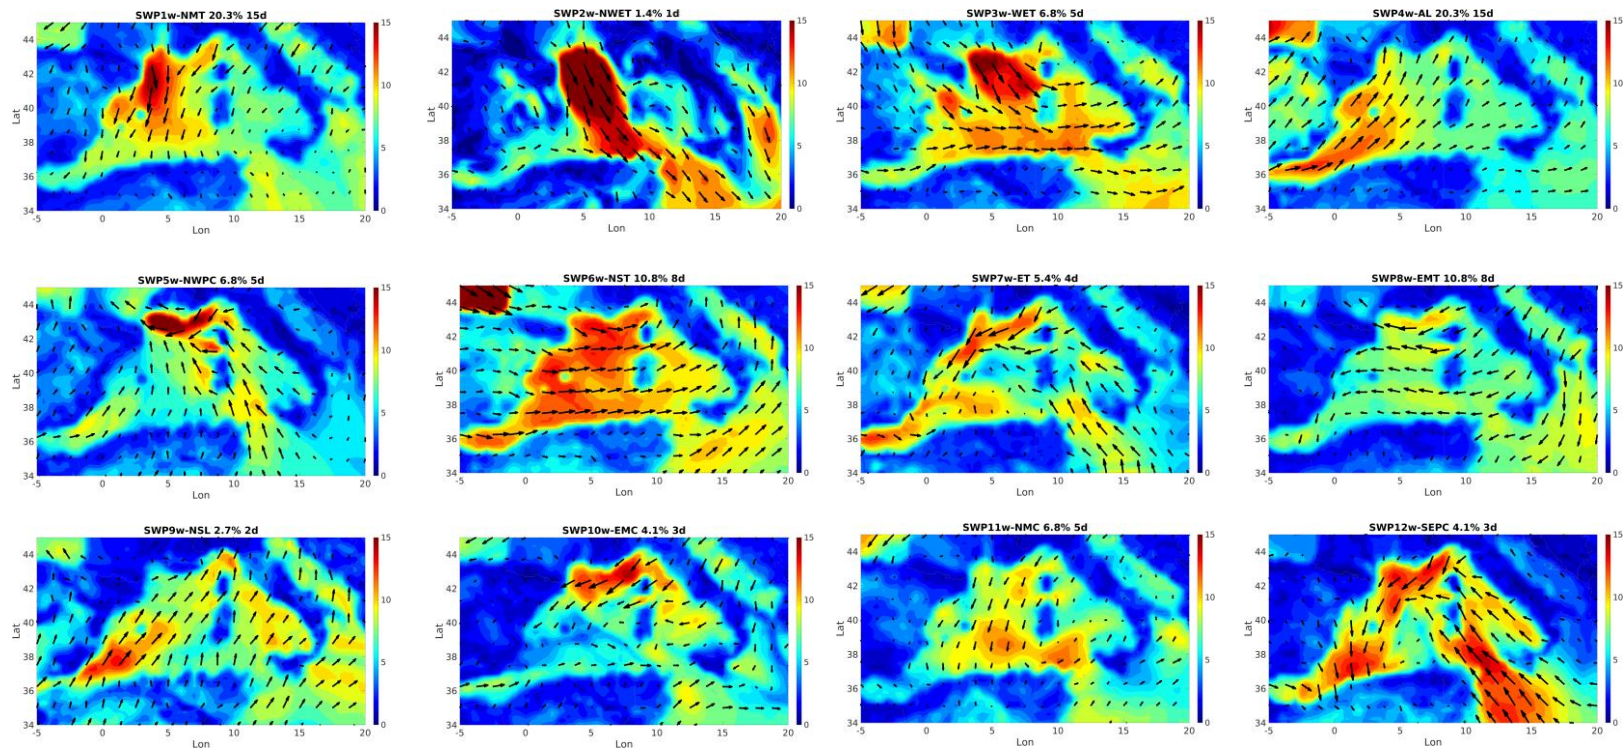

Figure S6. Composites of the MSLP (contour lines) and Z500 (colormap) fields for the 17 SWP of solo rain (SR) type.

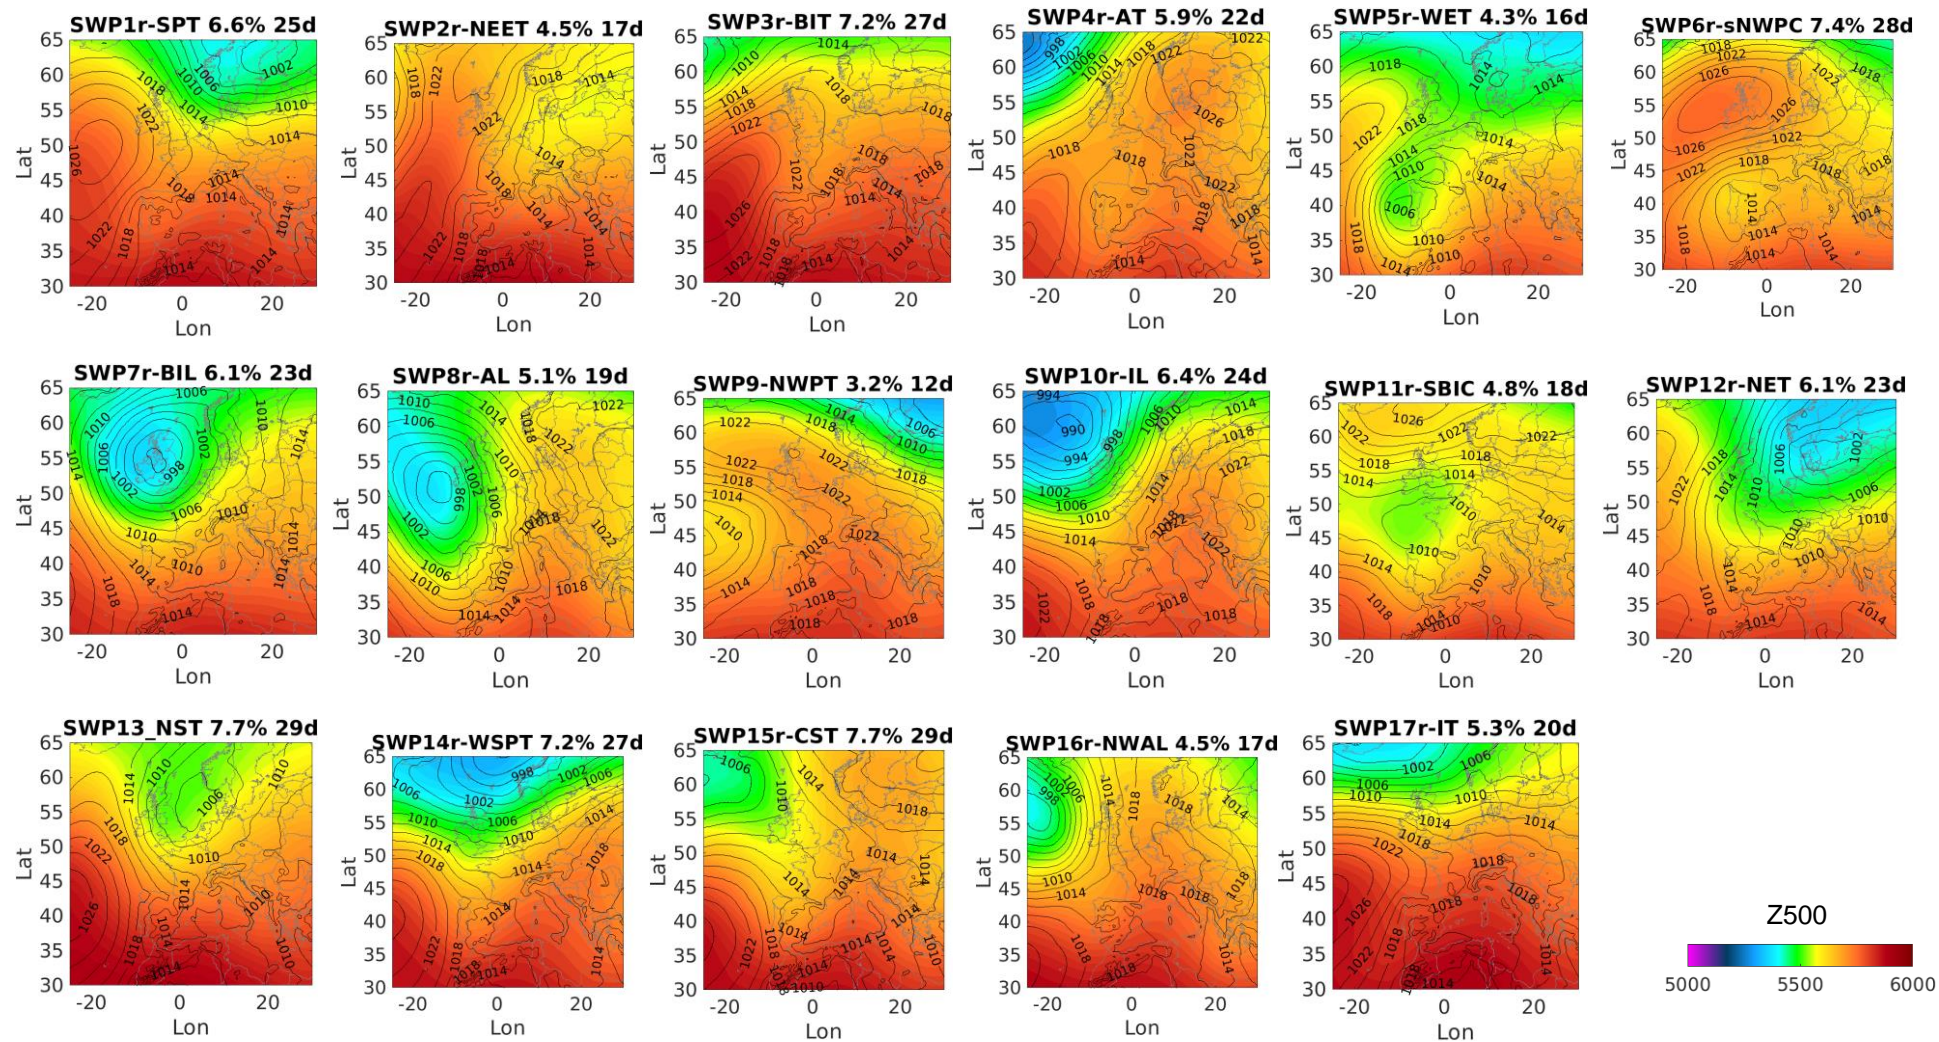



Figure S7. Composites of wind field for the 17 SWP of solo rain (SR) type.

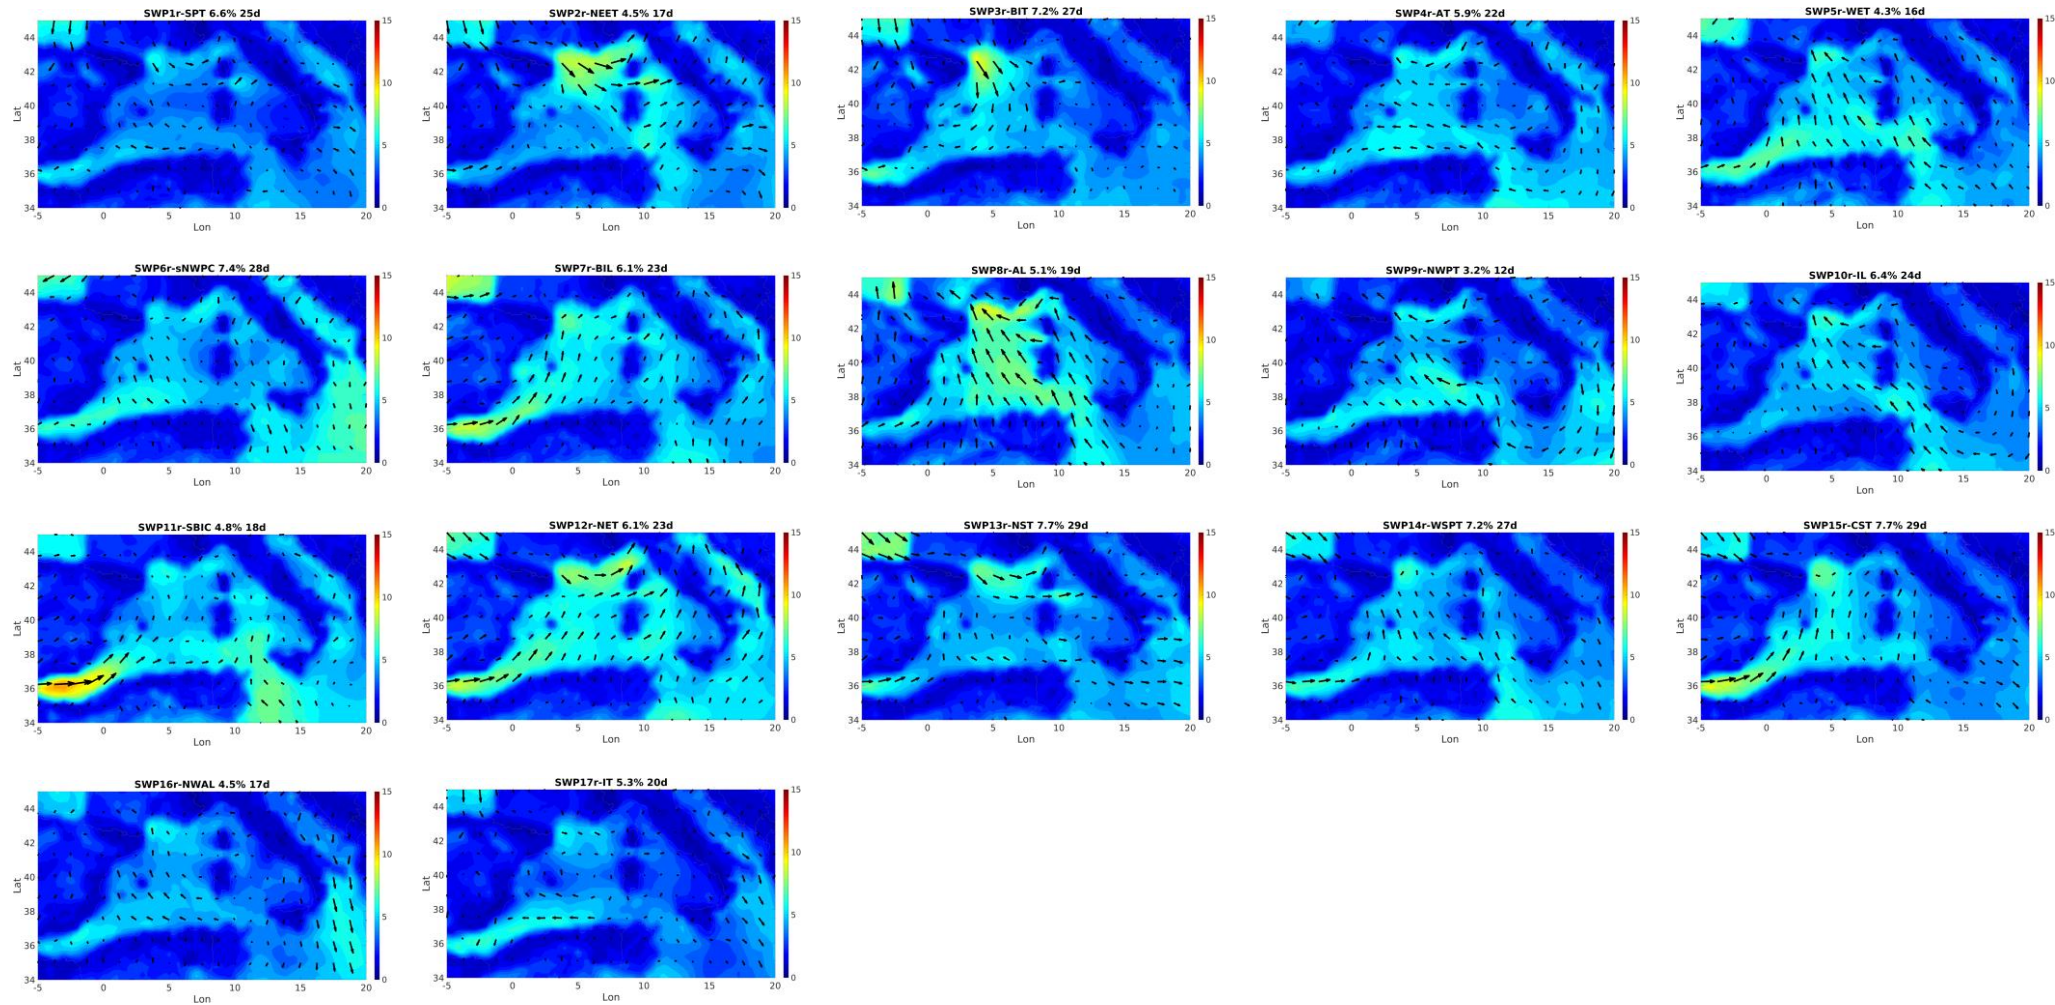

Supplement: Supplementary file 1 [file hess-2023-104-supplement.pdf]
